# Supplementary material
Source: Research Square preprint supplement (doi:10.21203/rs.3.rs-9666379/v1)
Supplement: Supplementary file 1 [file 6b05a5dd17143263f00be256.xlsx]

## Sheet: Sheet1
x	y	Stations	Zone	Land Degradation	HWD	HWM	HWN	HWF
74.625	36.375	Muzafarabad	A	5033	3	4.5	1	3
73.375	36.125	Gupis	A	6453	5	1.3	1	5
71.875	35.875	Chitral	A	5534	4	2.4	3	10
74.875	35.875	Chilas	A	6435	3	4.6	1	3
73.625	35.375	Kalam	A	5534	0	0	0	0
75.625	35.375	Skardu	A	6435	3	4.4	1	3
71.625	34.125	Peshawar	A	6435	4	2.2	4	13
73.375	34.625	Balakot	A	6435	0	0	0	0
70.125	33.875	Parachinar	A	5809	8	3.2	2	12
71.875	33.875	Cherat	A	5033	4	3.8	3	11
72.875	33.125	Padidan	B	5809	6	1.6	3	13
73.875	33.375	Rawlakot	B	6435	6	1	2	8
72.875	32.875	Chakwal	B	5534	6	1.6	3	13
73.625	32.875	Jehlum	B	5809	7	0.9	2	11
75	32.5	Gujrat	B	6435	6	1.3	2	16
70.875	31.875	D.I.Khan	B	5534	6	2	4	10
71.125	31.625	Bhakkar	B	5809	6	1.7	2	12
72.375	31.375	Jhang	B	5534	5	1.7	2	9
74.375	31.375	Lahore	B	5809	6	2.6	3	12
66.875	30.375	Quetta	C	15137	3	0.5	2	6
64.625	28.875	Dalbandin	C	5534	5	1.7	1	5
69.3	31.3	Zhob	C	15137	4	2	3	10
66.8	30.1	P.B.O Sheikhmanda	C	15137	3	0.5	3	9
70.625	30.125	DG Khan	D	5534	3	1.8	1	3
71.625	30.125	Multan	D	5809	4	1.1	2	7
73.125	29.91	Bahawal Nagar	D	5534	4	0.9	2	6
69.625	29.875	Barkhan	D	15137	6	0.9	2	9
67.875	29.625	M.O. Sibbi	D	15137	3	0.6	1	3
71.625	29.375	Bahawal pur	D	5033	4	0.9	1	4
72.375	30.875	Toba Tek Singh	D	5534	5	0.9	3	12
73.375	30.875	Okara	D	5809	4	1.5	3	11
70.375	28.375	Rahim yar Khan	D	5534	3	0.7	2	6
68.875	27.625	Rohri	D	5534	4	0.5	1	4
67.875	26.625	Dadu	E	15137	3	0.8	1	6
63.125	26.125	Turbat	E	15137	7	0.5	3	16
68.375	26.125	Nawabshah	E	15137	3	1.3	2	6
63.375	25.375	Pasni	E	15137	7	0.5	4	19
66.625	25.875	Lasbella	E	15137	4	0.2	2	7
68.625	25.375	Hyderabad	E	15137	5	0.8	2	9
63.75	25.4	Tandojam	E	15137	0	0	0	0
67.125	24.875	M.O Thatta	E	15137	0	0	0	0
68.2	24.875	AER Karachi	E	15137	4	0.6	1	4
70	24.625	Badin	E	15137	0	0	0	0
